# Supplementary material for: Synthesis and catalytic activity of an electron-deficient copper–ethylene triazapentadienyl complex
Source: Royal Society of Chemistry journal article supplement (doi:10.1039/b911981g), 2009-01-01
Supplement: b911981g.pdf [file b911981g.pdf]

# **Synthesis and Catalytic Activity of an Electron-Deficient Copper-Ethylene Triazapentadienyl Complex**

**Jaime A. Flores, Vivek Badarinarayana, Shreeyukta Singh, Carl J. Lovely,  
H.V. Rasika Dias**

[Supporting Information](#)

**Table S1. Crystal data and structure refinement for [N{(C<sub>3</sub>F<sub>7</sub>)C(Dipp)N}<sub>2</sub>]Cu(C<sub>2</sub>H<sub>4</sub>), dias174t.**

|                                   |                                                                   |                 |
|-----------------------------------|-------------------------------------------------------------------|-----------------|
| Identification code               | dias174t                                                          |                 |
| Empirical formula                 | C <sub>34</sub> H <sub>38</sub> Cu F <sub>14</sub> N <sub>3</sub> |                 |
| Formula weight                    | 818.21                                                            |                 |
| Temperature                       | 100(2) K                                                          |                 |
| Wavelength                        | 0.71073 Å                                                         |                 |
| Crystal system                    | Monoclinic                                                        |                 |
| Space group                       | P2(1)/n                                                           |                 |
| Unit cell dimensions              | a = 10.4857(4) Å                                                  | α = 90°.        |
|                                   | b = 23.4593(9) Å                                                  | β = 97.622(1)°. |
|                                   | c = 14.9020(6) Å                                                  | γ = 90°.        |
| Volume                            | 3633.3(2) Å <sup>3</sup>                                          |                 |
| Z                                 | 4                                                                 |                 |
| Density (calculated)              | 1.496 Mg/m <sup>3</sup>                                           |                 |
| Absorption coefficient            | 0.702 mm <sup>-1</sup>                                            |                 |
| F(000)                            | 1672                                                              |                 |
| Crystal size                      | 0.31 x 0.21 x 0.05 mm <sup>3</sup>                                |                 |
| Theta range for data collection   | 1.63 to 27.52°.                                                   |                 |
| Index ranges                      | -13 ≤ h ≤ 13, -30 ≤ k ≤ 30, -19 ≤ l ≤ 19                          |                 |
| Reflections collected             | 50026                                                             |                 |
| Independent reflections           | 50113 [R(int) = 0.0338]                                           |                 |
| Completeness to theta = 27.52°    | 99.8 %                                                            |                 |
| Absorption correction             | Semi-empirical from equivalents                                   |                 |
| Max. and min. transmission        | 0.9664 and 0.8144                                                 |                 |
| Refinement method                 | Full-matrix least-squares on F <sup>2</sup>                       |                 |
| Data / restraints / parameters    | 50113 / 0 / 516                                                   |                 |
| Goodness-of-fit on F <sup>2</sup> | 1.031                                                             |                 |
| Final R indices [I > 2σ(I)]       | R1 = 0.0431, wR2 = 0.0643                                         |                 |
| R indices (all data)              | R1 = 0.0685, wR2 = 0.0679                                         |                 |
| Largest diff. peak and hole       | 1.380 and -0.922 e.Å <sup>-3</sup>                                |                 |

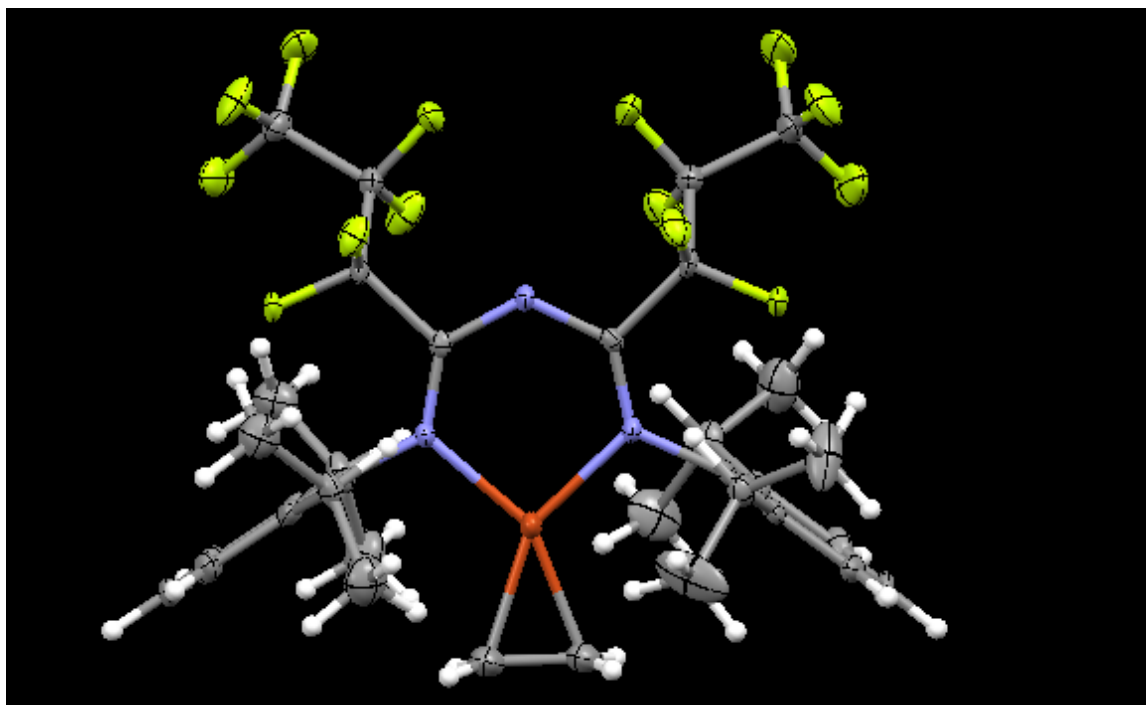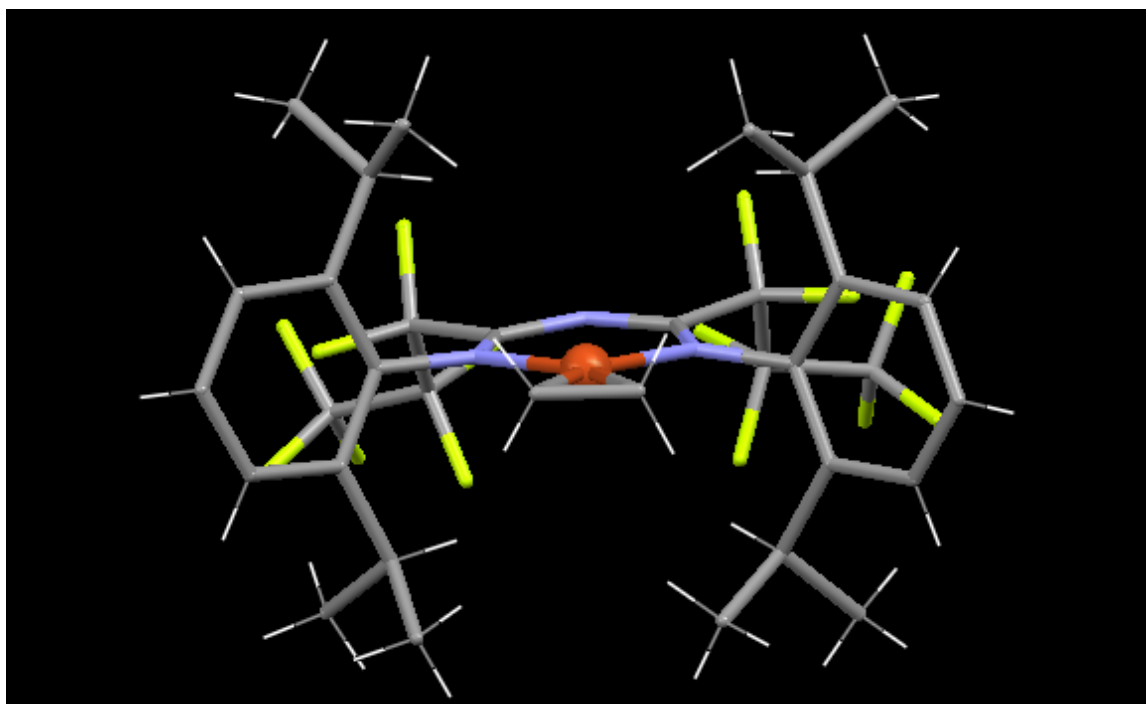

**Figure S1.** Two views of [N{(C<sub>3</sub>F<sub>7</sub>)C(Dipp)N}<sub>2</sub>]Cu(C<sub>2</sub>H<sub>4</sub>) based on X-ray data

**Starting material:**  $[\text{N}\{(\text{C}_3\text{F}_7)\text{C}(\text{Dipp})\text{N}\}_2]\text{H}$  (Dipp = 2,6-diisopropylphenyl)<sup>1</sup>,  $[\text{N}\{(\text{C}_3\text{F}_7)\text{C}(\text{Dipp})\text{N}\}_2]\text{CuNCCH}_3$ <sup>1</sup> and *N*-(*p*-toluenesulfonyl)phenyliodinane<sup>2</sup> were synthesized using published procedures.  $(\text{CuOTf})_2 \cdot \text{benzene}$ , *n*-butyllithium, ethylene, ethyl diazoacetate and Silica gel, 200 - 400 mesh, 60 Å were purchased from commercial sources. Experimental details are in the manuscript.

**Products from catalytic processes and the <sup>1</sup>H NMR data**

***N*-(*p*-Toluenesulfonyl)-2-phenylaziridine.<sup>3-5</sup>**

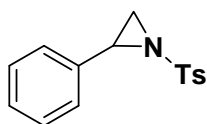

<sup>1</sup>H NMR ( $\text{CDCl}_3$ )  $\delta$  = 7.85 (d, 2H,  $J$  = 8.3 Hz), 7.32 to 7.19 (m, 7H), 3.76 (dd, 1H,  $J$  = 7.3 Hz,  $J$  = 4.4 Hz, 1H), 2.97 (d, 1H,  $J$  = 6.8 Hz), 2.42 (s, 3H,  $\text{CH}_3$ ), 2.37 (d, 1H,  $J$  = 4.9 Hz)

***N*-(*p*-Toluenesulfonyl)-9-azabicyclo[6.1.0]nonane.<sup>5-8</sup>**

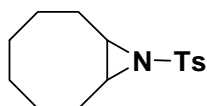

<sup>1</sup>H NMR ( $\text{CDCl}_3$ )  $\delta$  = 7.78 (d, 2H,  $J$  = 7.3 Hz, *m*-Ar), 7.29 (d, 2H,  $J$  = 7.3 Hz, *o*-Ar), 2.78-2.74 (m, 1H), 2.42 (s, 3H,  $\text{CH}_3$ ), 2.20-1.97 (m, 1H), 1.55 to 1.25 (m, 12H,  $\text{CH}_2$ )

**Ethyl 2-phenylcyclopropane-1-carboxylate.**<sup>9-11</sup>

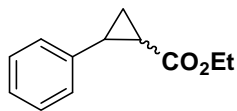

<sup>1</sup>H NMR (CDCl<sub>3</sub>) δ = Cis: 7.27 to 7.14 (m, 5H, *o,m,p*-Ar), 3.86 (q, 2H, *J* = 7.2 Hz, CH<sub>2</sub>), 2.57 (q, 1H, *J* = 8.1 Hz), 2.10 to 2.01 (m, *J* = 6.0 Hz, 1H), 1.73 to 1.66 (m, *J* = 5.3 Hz, 1H), 1.35 to 1.26 (m, 1H), 0.95 (t, 3H, *J* = 7.1 Hz, CH<sub>3</sub>); trans: 7.29 to 7.60 (m, 5H, *o,m,p*-Ar), 4.15 (q, 2H, *J* = 7.0 Hz, CH<sub>2</sub>), 2.53-2.47 (m, 1H, *J* = 5.0 Hz), 1.92 to 1.85 (m, 1H, *J* = 4.5 Hz), 1.63 to 1.55 (m, 1H, *J* = 4.8 Hz), 1.33 to 1.27 (m, 1H), 1.26 (t, 3H, *J* = 7.3 Hz, CH<sub>3</sub>)

**Ethyl propoxyacetate.**<sup>12</sup>

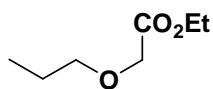

<sup>1</sup>H NMR (CDCl<sub>3</sub>) δ = 4.19 (q, 2H, *J* = 7.2 Hz, CO<sub>2</sub>CH<sub>2</sub>), 4.04 (s, 2H, CH<sub>2</sub>CO<sub>2</sub>), 3.46 (t, 2H, *J* = 6.7 Hz, CH<sub>2</sub>O), 1.62 (sextet, 2H, *J* = 7.2 Hz, CH<sub>2</sub>), 1.26 (t, 3H, *J* = 7.3 Hz, CH<sub>2</sub>CH<sub>3</sub>), 0.91 (t, 3H, *J* = 7.6 Hz, CH<sub>3</sub>)

**Ethyl isopropoxyacetate.**<sup>12</sup>

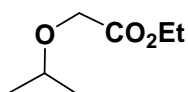

<sup>1</sup>H NMR (CDCl<sub>3</sub>) δ = 4.19 (q, 2H, *J* = 7.0 Hz, CO<sub>2</sub>CH<sub>2</sub>CH<sub>3</sub>), 4.04 (s, 2H, CH<sub>2</sub>CO<sub>2</sub>), 3.65 (heptet, 1H, *J* = 6.3 Hz, CH(CH<sub>3</sub>)<sub>2</sub>), 1.26 (t, 3H, *J* = 7.1 Hz, CH<sub>3</sub>), 1.18 (d, 6H, *J* = 6.4 Hz, CH(CH<sub>3</sub>)<sub>2</sub>)

**Ethyl N-pyrrolidinylacetate.**<sup>13</sup>

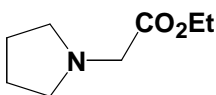

<sup>1</sup>H NMR (CDCl<sub>3</sub>), selected:  $\delta = 3.30$  (s, 2H, NCH<sub>2</sub>CO<sub>2</sub>C<sub>2</sub>H<sub>5</sub>).

**Ethyl 2-(phenylamino)acetate.**<sup>13-14</sup>

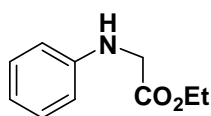

<sup>1</sup>H NMR (CDCl<sub>3</sub>)  $\delta = 7.19$  (t, 2H,  $J = 7.8$  Hz, *m*-Ar), 6.74 (t, 1H,  $J = 7.3$  Hz, *p*-Ar), 6.60 (d, 2H,  $J = 7.8$  Hz, *o*-Ar), 4.23 (q, 2H,  $J = 7.3$  Hz, CH<sub>2</sub>), 3.89 (s, 2H, CH<sub>2</sub>), 1.28 (t, 3H,  $J = 7.1$  Hz, CH<sub>3</sub>)

**Ethyl 3-ethoxybutanoate.**<sup>15</sup>

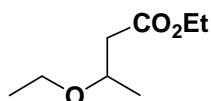

<sup>1</sup>H NMR (CDCl<sub>3</sub>)  $\delta = 4.12$  (q, 2H,  $J = 7.2$  Hz, CO<sub>2</sub>CH<sub>2</sub>CH<sub>3</sub>), 3.84 (sextet, 1H,  $J = 6.4$  Hz, CH), 3.48 (m, 2H,  $J = 7.1$  Hz, CH<sub>2</sub>O), 2.55 (dd, 1H,  $J = 14.7$  Hz,  $J = 7.3$  Hz, CH<sub>2</sub>CO<sub>2</sub>), 2.33 (dd, 1H,  $J = 14.7$  Hz,  $J = 6.0$  Hz, CH<sub>2</sub>CO<sub>2</sub>), 1.23 (t, 3H,  $J = 7.1$  Hz, CH<sub>3</sub>), 1.17 (d, 3H,  $J = 6.0$  Hz, CHCH<sub>3</sub>), 1.14 (t, 3H,  $J = 6.9$  Hz, CH<sub>3</sub>)

**Ethyl (tetrahydrofuran-2-yl)acetate.<sup>15</sup>**

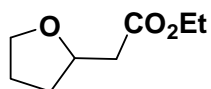

<sup>1</sup>H NMR (CDCl<sub>3</sub>) δ = 4.22 (quintet, 1H, *J* = 6.8 Hz, CH), 4.13 (q, 2H, *J* = 7.1 Hz, CO<sub>2</sub>CH<sub>2</sub>CH<sub>3</sub>), 3.89 to 3.68 (m, 2H, *J* = 7.0 Hz, CH<sub>2</sub>O), 2.56 (dd, 1H, *J* = 15.1 Hz, *J* = 7.2 Hz, CH<sub>2</sub>CO<sub>2</sub>), 2.43 (dd, 1H, *J* = 15.1 Hz, *J* = 6.2 Hz, CH<sub>2</sub>CO<sub>2</sub>), 2.05 (m, 1H, CH<sub>2</sub>), 1.88 (m, 2H, CH<sub>2</sub>), 1.53 (m, 1H, CH<sub>2</sub>), 1.24 (t, 3H, *J* = 6.9 Hz, CH<sub>3</sub>)

**Table S2. Catalysis by nitrene and carbene transfer with  $[N\{(C_3F_7)C(Dipp)N\}_2]CuL$ ,**

**L = NCCH<sub>3</sub>, C<sub>2</sub>H<sub>4</sub>.**

| Entry                       | Catalyst →<br>Substrate                                                             | $[N\{(C_3F_7)C(Dipp)N\}_2]$<br>CuNCCH <sub>3</sub><br>Yield (%) | $[N\{(C_3F_7)C(Dipp)N\}_2]$<br>CuC <sub>2</sub> H <sub>4</sub><br>Yield (%) | Catalyst<br>Loading<br>(mol%) |
|-----------------------------|-------------------------------------------------------------------------------------|-----------------------------------------------------------------|-----------------------------------------------------------------------------|-------------------------------|
| Aziridination of alkenes    |                                                                                     |                                                                 |                                                                             |                               |
| 1                           | 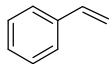   | 98                                                              | 96                                                                          | 5                             |
| 2                           |    | 76                                                              | 76                                                                          | 5                             |
| Cyclopropanation of styrene |                                                                                     |                                                                 |                                                                             |                               |
| 3                           |    | 97 (1.6)*                                                       | 93 (1.6)*                                                                   | 5                             |
| O-H activation of alcohols  |                                                                                     |                                                                 |                                                                             |                               |
| 4                           |   | 85                                                              | 90                                                                          | 2                             |
| 5                           |  | 85                                                              | 91                                                                          | 2                             |
| N-H activation of amines    |                                                                                     |                                                                 |                                                                             |                               |
| 6                           |  | 80                                                              | 93                                                                          | 2                             |
| 7                           |  | 85                                                              | ~100                                                                        | 2                             |
| C-H Activation of ethers    |                                                                                     |                                                                 |                                                                             |                               |
| 8                           |  | 94                                                              | 92                                                                          | 5                             |
| 9                           |  | 98                                                              | 98                                                                          | 5                             |

\* cis/trans



## References

1. Dias, H. V. R.; Singh, S. *Inorg. Chem.* **2004**, *43*, 5786-5788
2. Yamada, Y.; Yamamoto, T.; Okawara, M. *Chem. Lett.* **1975**, *4*, 361-362
3. Minakata, S.; Morino, Y.; Oderaotoshi, Y.; Komatsu, M. *Chem. Commun.* **2006**, 3337-3339
4. Zdilla, M.; Abu-Omar, M. *J. Am. Chem. Soc.* **2006**, *128*, 16971-16979
5. Kumar, G. D.; Baskaran, S. *Chem. Commun.* **2004**, 1026-1027
6. Han, J.; Li, Y.; Zhi, S.; Pan, Y.; Timmons, C.; Li, G. *Tetrahedron Lett.* **2006**, *47*, 7225-7228
7. Vyas, R.; Gao, G.-Y.; Harden, J. D.; Zhang, X. P. *Org. Lett.* **2004**, *6*, 1907-1910
8. Bhuyan, R.; Nocholas, K. *Org. Lett.* **2007**, *9*, 3957-3959
9. Fructos, M. R.; Belderrain, T. R.; de Fremont, P.; Scott, N.; Nolan, S.; Diaz-Requejo, M. M.; Perez, P. J. *Angew. Chem. Int. Ed.* **2005**, *44*, 5284-5288
10. Khanbabae, K.; Basceken, S.; Flörke, U. *Eur. J. Org. Chem.* **2007**, 831-837
11. Lou, Y.; Horikawa, M.; Kloster, R.; Hawryluk, N.; Corey, E. *J. Am. Chem. Soc.* **2004**, *126*, 8916-8918
12. Morilla, M. E.; Molina, M. J.; Diaz-Requejo, M. M.; Belderrain, T. R.; Nicasio, M. C.; Trofimenko, S.; Perez, P. J. *Organometallics* **2003**, *22*, 2914-2918
13. Fructos, M. R.; Belderrain, T. R.; Nicasio, C.; Nolan, S.; Kaur, H.; Diaz-Requejo, M. M.; Perez, P. J. *J. Am. Chem. Soc.* **2004**, *126*, 10846-10847
14. Aviv, I.; Gross, Z. *Chem. Eur. J.* **2008**, *14*, 3995-4005
15. Caballero, A.; Diaz-Requejo, M. M.; Belderrain, T. R.; Nicasio, M. C.; Trofimenko, S.; Perez, P. J. *Organometallics* **2003**, *22*, 4145-4150
